# Supplementary material
Source: publisher figshare collection journal article supplement (https://future-science-group.figshare.com/ndownloader/files/33895277)
Supplement: Supplementary file 1 [file 33895277]

**Supplementary Material**

**Table 1.** Study locations of TALAPRO-2

| **Location** | **Activity status** |
| --- | --- |
| **United States, Arizona** | |
| Ironwood Physicians P.C. dba Ironwood Cancer & Research Centers Chandler, Arizona, United States, 85224 | **Recruiting** |
| Banner Gateway Medical Center  Gilbert, Arizona, United States, 85234 | **Not yet recruiting** |
| Banner MD Anderson Cancer Center  Gilbert, Arizona, United States, 85234 | **Not yet recruiting** |
| Ironwood Physicians P.C. dba Ironwood Cancer & Research Centers Gilbert, Arizona, United States, 85297 | **Recruiting** |
| Ironwood Physicians P.C. dba Ironwood Cancer & Research Centers Mesa, Arizona, United States, 85202 | **Recruiting** |
| Ironwood Physicians P.C. dba Ironwood Cancer & Research Centers Mesa, Arizona, United States, 85206 | **Recruiting** |
| Ironwood Physicians P.C. dba Ironwood Cancer & Research Centers Scottsdale, Arizona, United States, 85260 | **Recruiting** |
| Urological Associates of Southern Arizona, PC  Tucson, Arizona, United States, 85715 | **Recruiting** |
| Urological Associates of Southern Arizona, P.C.  Tucson, Arizona, United States, 85741 | **Recruiting** |
| **United States, California** | |
| Beverly Hills Cancer Center  Beverly Hills, California, United States, 90211 | **Recruiting** |
| South County Hematology/Oncology  Chula Vista, California, United States, 91911 | **Recruiting** |
| Sharp Rees-Stealy  Chula Vista, California, United States, 91913 | **Recruiting** |
| Glendale Adventist Medical Center  Glendale, California, United States, 91206 | **Recruiting** |
| Marin Cancer Care, Inc.  Greenbrae, California, United States, 94904 | **Recruiting** |
| Cancer Center Oncology Medical Group  La Mesa, California, United States, 91942 | **Recruiting** |
| Loma Linda University Cancer Center - Hematology/Oncology Clinic Loma Linda, California, United States, 92354 | **Not yet recruiting** |
| Loma Linda University Medical Center  Loma Linda, California, United States, 92354 | **Not yet recruiting** |
| VA Long Beach Healthcare System  Long Beach, California, United States, 90822 | **Recruiting** |
| UCLA Clark Urology Center  Los Angeles, California, United States, 90095 | **Recruiting** |
| University of California, Irvine Medical Center  Orange, California, United States, 92868 | **Recruiting** |
| Stanford Cancer Institute  Palo Alto, California, United States, 94304 | **Recruiting** |
| Desert Hematology Oncology Medical Group, Incorporation  Rancho Mirage, California, United States, 92270 | **Recruiting** |
| Eisenhower Medical Center  Rancho Mirage, California, United States, 92270 | **Recruiting** |
| Medical Oncology Associates-SD  San Diego, California, United States, 92123 | **Recruiting** |
| Sharp Memorial Hospital Investigational Pharmacy  San Diego, California, United States, 92123 | **Recruiting** |
| Sharp Rees-Stealy  San Diego, California, United States, 92123 | **Recruiting** |
| **United States, Colorado** | |
| University of Colorado Denver CTO/CTRC  Aurora, Colorado, United States, 80045 | **Recruiting** |
| University of Colorado Hospital - Anschutz Cancer Pavilion  Aurora, Colorado, United States, 80045 | **Recruiting** |
| University of Colorado Hospital- Anschutz Inpatient Pavilion  Aurora, Colorado, United States, 80045 | **Recruiting** |
| University of Colorado Hospital- Anschutz Outpatient Pavilion  Aurora, Colorado, United States, 80045 | **Recruiting** |
| University of Colorado Hospital  Aurora, Colorado, United States, 80045 | **Recruiting** |
| The Urology Center of Colorado  Denver, Colorado, United States, 80211 | **Recruiting** |
| **United States, Connecticut** | |
| Danbury Hospital  Danbury, Connecticut, United States, 06810 | **Not yet recruiting** |
| New Milford Hospital  New Milford, Connecticut, United States, 06776 | **Not yet recruiting** |
| Norwalk Hospital  Norwalk, Connecticut, United States, 06856 | **Not yet recruiting** |
| **United States, Florida** | |
| Florida Cancer Specialists  Altamonte Springs, Florida, United States, 32701 | **Not yet recruiting** |
| Florida Cancer Specialists  Bonita Springs, Florida, United States, 34135 | **Not yet recruiting** |
| Florida Cancer Specialists  Bradenton, Florida, United States, 34211 | **Not yet recruiting** |
| Florida Cancer Specialists  Brandon, Florida, United States, 33511 | **Not yet recruiting** |
| Florida Cancer Specialists  Cape Coral, Florida, United States, 33909 | **Not yet recruiting** |
| AdventHealth Medical Group Hematology & Oncology at Celebration, Celebration, Florida, United States, 34747 | **Recruiting** |
| Florida Cancer Specialists  Clearwater, Florida, United States, 33761 | **Not yet recruiting** |
| Florida Cancer Specialists  Daytona Beach, Florida, United States, 32117 | **Recruiting** |
| Florida Cancer Specialists  Fort Myers, Florida, United States, 33901 | **Not yet recruiting** |
| Florida Cancer Specialists  Fort Myers, Florida, United States, 33905 | **Not yet recruiting** |
| 21st Century Oncology  Fort Myers, Florida, United States, 33908 | **Not yet recruiting** |
| Florida Cancer Specialists  Gainesville, Florida, United States, 32605 | **Not yet recruiting** |
| AdventHealth Medical Group Hematology & Oncology at Kissimmee Kissimmee, Florida, United States, 34741 | **Recruiting** |
| Lakeland Regional Health Hollis Cancer Center  Lakeland, Florida, United States, 33805 | **Recruiting** |
| Florida Cancer Specialists  Largo, Florida, United States, 33770 | **Not yet recruiting** |
| Florida Cancer Specialists  Lecanto, Florida, United States, 34461 | **Not yet recruiting** |
| Florida Cancer Specialists  Naples, Florida, United States, 34102 | **Not yet recruiting** |
| Florida Cancer Specialists  New Port Richey, Florida, United States, 34655 | **Not yet recruiting** |
| Florida Cancer Specialists  Ocala, Florida, United States, 34471 | **Not yet recruiting** |
| Florida Cancer Specialists  Orange City, Florida, United States, 32763 | **Not yet recruiting** |
| AdventHealth Hematology and Oncology  Orlando, Florida, United States, 32804 | **Recruiting** |
| Investigational Drug Services, Advent Health Orlando  Orlando, Florida, United States, 32804 | **Recruiting** |
| Florida Cancer Specialists  Orlando, Florida, United States, 32806 | **Not yet recruiting** |
| Florida Cancer Specialists  Port Charlotte, Florida, United States, 33980 | **Not yet recruiting** |
| Florida Cancer Specialists  Saint Petersburg, Florida, United States, 33705 | **Not yet recruiting** |
| Florida Cancer Specialists  Sarasota, Florida, United States, 34232 | **Not yet recruiting** |
| Florida Cancer Specialists  Sarasota, Florida, United States, 34236 | **Not yet recruiting** |
| Florida Cancer Specialists  Spring Hill, Florida, United States, 34608 | **Not yet recruiting** |
| Florida Cancer Specialists  Tampa, Florida, United States, 33607 | **Not yet recruiting** |
| Florida Cancer Specialists  Tavares, Florida, United States, 32778 | **Not yet recruiting** |
| Florida Cancer Specialists  The Villages, Florida, United States, 32159 | **Not yet recruiting** |
| Florida Cancer Specialists  Venice, Florida, United States, 34285 | **Not yet recruiting** |
| Florida Cancer Specialists  Venice, Florida, United States, 34292 | **Not yet recruiting** |
| Florida Cancer Specialists  Vero Beach, Florida, United States, 32960 | **Recruiting** |
| Florida Cancer Specialists  Wellington, Florida, United States, 33414 | **Recruiting** |
| Florida Cancer Specialists  West Palm Beach, Florida, United States, 33401 | **Recruiting** |
| Florida Cancer Specialists  Winter Park, Florida, United States, 32792 | **Not yet recruiting** |
| **United States, Georgia** | |
| University Cancer & Blood Center, LLC  Athens, Georgia, United States, 30607 | **Not yet recruiting** |
| Piedmont Cancer Institute  Atlanta, Georgia, United States, 30318 | **Recruiting** |
| Emory University Hospital  Atlanta, Georgia, United States, 30322 | **Not yet recruiting** |
| The Emory Clinic  Atlanta, Georgia, United States, 30322 | **Not yet recruiting** |
| Winship Cancer Institute Emory University  Atlanta, Georgia, United States, 30322 | **Not yet recruiting** |
| Piedmont Cancer Institute  Fayetteville, Georgia, United States, 30214 | **Recruiting** |
| Piedmont Cancer Institute  Newnan, Georgia, United States, 30265 | **Recruiting** |
| Southeastern Regional Medical Center  Newnan, Georgia, United States, 30265 | **Active, not recruiting** |
| **United States, Illinois** | |
| Cook County Health (CCH)  Chicago, Illinois, United States, 60612 | **Recruiting** |
| John H. Stroger, Jr. Hospital of Cook County/IND Pharmacy  Chicago, Illinois, United States, 60612 | **Recruiting** |
| Rush University Medical Center Professional Office Building Infusion Pharmacy, Chicago, Illinois, United States, 60612 | **Not yet recruiting** |
| Rush University Medical Center  Chicago, Illinois, United States, 60612 | **Not yet recruiting** |
| AMITA Health Adventist Medical Center Hinsdale  Hinsdale, Illinois, United States, 60521 | **Recruiting** |
| AMITA Health Cancer Institute  Hinsdale, Illinois, United States, 60521 | **Recruiting** |
| Midwestern Regional Medical Center  Zion, Illinois, United States, 60099 | **Recruiting** |
| **United States, Indiana** | |
| First Urology, PSC  Jeffersonville, Indiana, United States, 47130 | **Recruiting** |
| **United States, Iowa** | |
| University of Iowa Hospitals and Clinics  Iowa City, Iowa, United States, 52242 | **Active, not recruiting** |
| **United States, Kansas** | |
| The University of Kansas Clinical Research Center  Fairway, Kansas, United States, 66205 | **Recruiting** |
| The University of Kansas Cancer Center  Westwood, Kansas, United States, 66205 | **Recruiting** |
| **United States, Kentucky** | |
| First Urology, PSC  Louisville, Kentucky, United States, 40207 | **Recruiting** |
| **United States, Louisiana** | |
| Ochsner Clinic Foundation  New Orleans, Louisiana, United States, 70121 | **Active, not recruiting** |
| **United States, Maryland** | |
| University of Maryland Greenebaum Comprehensive Cancer Center Baltimore, Maryland, United States, 21201 | **Not yet recruiting** |
| **United States, Missouri** | |
| VA Saint Louis Healthcare System  Saint Louis, Missouri, United States, 63106 | **Not yet recruiting** |
| **United States, Montana** | |
| St. Vincent Healthcare  Billings, Montana, United States, 59101 | **Not yet recruiting** |
| St. Vincent Frontier Cancer Center  Billings, Montana, United States, 59102 | **Not yet recruiting** |
| **United States, Nebraska** | |
| Oncology Hematology West, PC dba Nebraska Cancer Specialists Omaha, Nebraska, United States, 68114 | **Not yet recruiting** |
| Oncology Hematology West, PC dba Nebraska Cancer Specialists Omaha, Nebraska, United States, 68124 | **Not yet recruiting** |
| GU Research Network/Urology Cancer Center  Omaha, Nebraska, United States, 68130 | **Recruiting** |
| Oncology Hematology West, PC dba Nebraska Cancer Specialists Omaha, Nebraska, United States, 68130 | **Not yet recruiting** |
| **United States, New Jersey** | |
| New Jersey Cancer Care and Blood Disorders  Belleville, New Jersey, United States, 07109 | **Recruiting** |
| New Jersey Urology, LLC  Voorhees, New Jersey, United States, 08043 | **Active, not recruiting** |
| **United States, New Mexico** | |
| Urology Group of New Mexico  Albuquerque, New Mexico, United States, 87109 | **Recruiting** |
| San Juan Oncology Associates  Farmington, New Mexico, United States, 87401 | **Recruiting** |
| **United States, New York** | |
| Montefiore Medical Center - Montefiore Medical Park  Bronx, New York, United States, 10461 | **Recruiting** |
| Premier Medical Group of the Hudson Valley PC  Poughkeepsie, New York, United States, 12601 | **Recruiting** |
| Associated Medical Professionals of New York, PLLC  Syracuse, New York, United States, 13210 | **Recruiting** |
| **United States, Ohio** | |
| TriState Urologic Services PSC Inc., dba The Urology Group  Cincinnati, Ohio, United States, 45212 | **Recruiting** |
| Clinical Research Solutions  Middleburg Heights, Ohio, United States, 44130 | **Recruiting** |
| **United States, Oklahoma** | |
| Stephenson Cancer Center  Oklahoma City, Oklahoma, United States, 73104 | **Recruiting** |
| **United States, Oregon** | |
| Kaiser Sunnyside Medical Center  Clackamas, Oregon, United States, 97015-9303 | **Recruiting** |
| Providence Cancer Institute Clackamas Clinic  Clackamas, Oregon, United States, 97015 | **Recruiting** |
| Kaiser Westside Medical Center  Hillsboro, Oregon, United States, 97124 | **Recruiting** |
| Providence Cancer Institute Newberg Clinic  Newberg, Oregon, United States, 97132 | **Recruiting** |
| Providence Cancer Institute Franz Clinic  Portland, Oregon, United States, 97213 | **Recruiting** |
| Providence Oncology and Hematology Care Clinic - Westside  Portland, Oregon, United States, 97225 | **Recruiting** |
| Kaiser Permanente Northwest  Portland, Oregon, United States, 97227 | **Recruiting** |
| Oregon Urology Institute  Springfield, Oregon, United States, 97477 | **Not yet recruiting** |
| **United States, Pennsylvania** | |
| UPMC Hillman Cancer Center - Altoona  Altoona, Pennsylvania, United States, 16601 | **Recruiting** |
| UPMC Hillman Cancer Center - Upper St. Clair  Bethel Park, Pennsylvania, United States, 15102 | **Recruiting** |
| UPMC Hillman Cancer Center - Arnold Palmer - Mt View  Greensburg, Pennsylvania, United States, 15601 | **Recruiting** |
| Lancaster Urology  Lancaster, Pennsylvania, United States, 17604 | **Recruiting** |
| UPMC Hillman Cancer Center - Monroeville  Monroeville, Pennsylvania, United States, 15146 | **Recruiting** |
| UPMC Hillman Cancer Center  Pittsburgh, Pennsylvania, United States, 15232 | **Recruiting** |
| UPMC Hillman Cancer Center - Passavant (HOA)  Pittsburgh, Pennsylvania, United States, 15237 | **Recruiting** |
| UPMC Hillman Cancer Center - Passavant (OHA)  Pittsburgh, Pennsylvania, United States, 15237 | **Recruiting** |
| UPMC Hillman Cancer Center - Northwest  Seneca, Pennsylvania, United States, 16346 | **Recruiting** |
| UPMC Hillman Cancer Center - Uniontown  Uniontown, Pennsylvania, United States, 15401 | **Recruiting** |
| UPMC Hillman Cancer Center - Washington  Washington, Pennsylvania, United States, 15301 | **Recruiting** |
| **United States, South Carolina** | |
| Carolina Urologic Research Center  Myrtle Beach, South Carolina, United States, 29572 | **Recruiting** |
| **United States, Tennessee** | |
| Sarah Cannon Research Institute  Chattanooga, Tennessee, United States, 37404 | **Recruiting** |
| Tennessee Oncology, PLLC  Chattanooga, Tennessee, United States, 37404 | **Recruiting** |
| Tennesse Oncology, PLLC  Cleveland, Tennessee, United States, 37311 | **Recruiting** |
| Tennessee Cancer Specialists-Harrogate  Harrogate, Tennessee, United States, 37752 | **Not yet recruiting** |
| Tennessee Cancer Specialists-Jefferson City  Jefferson City, Tennessee, United States, 37760 | **Not yet recruiting** |
| Center for Biomedical Research  Knoxville, Tennessee, United States, 37909 | **Not yet recruiting** |
| Tennessee Cancer Specialists  Knoxville, Tennessee, United States, 37909 | **Not yet recruiting** |
| Tennessee Cancer Specialists-Morristown  Morristown, Tennessee, United States, 37813 | **Not yet recruiting** |
| Urology Associates P.C.  Nashville, Tennessee, United States, 37209 | **Recruiting** |
| The Vanderbilt Clinic  Nashville, Tennessee, United States, 37232 | **Active, not recruiting** |
| Vanderbuilt University Medical Center, Department of Urology Nashville, Tennessee, United States, 37232 | **Active, not recruiting** |
| **United States, Texas** | |
| Urology Austin PLLC  Austin, Texas, United States, 78745 | **Not yet recruiting** |
| Rio Grande Urology, P.A.  El Paso, Texas, United States, 79912 | **Recruiting** |
| Houston Metro Urology  Houston, Texas, United States, 77027 | **Recruiting** |
| Urology Austin, PLLC  Round Rock, Texas, United States, 78681 | **Not yet recruiting** |
| Baylor Scott and White Medical Center-Temple  Temple, Texas, United States, 76508 | **Recruiting** |
| **United States, Utah** | |
| Farmington Health Center -University of Utah  Farmington, Utah, United States, 84025 | **Recruiting** |
| Huntsman Cancer Hospital  Salt Lake City, Utah, United States, 84112 | **Recruiting** |
| University of Utah, Huntsman Cancer Institute  Salt Lake City, Utah, United States, 84112 | **Recruiting** |
| Redwood Health Center-University of Utah  Salt Lake City, Utah, United States, 84119 | **Recruiting** |
| South Jordan Health Center -University of Utah  South Jordan, Utah, United States, 84095 | **Recruiting** |
| **United States, Virginia** | |
| Inova Schar Cancer Institute Infusion Pharmacy  Fairfax, Virginia, United States, 22031 | **Recruiting** |
| Inova Schar Cancer Institute  Fairfax, Virginia, United States, 22031 | **Recruiting** |
| **United States, Washington** | |
| Swedish Cancer Institute  Seattle, Washington, United States, 98104 | **Active, not recruiting** |
| Swedish Medical Center  Seattle, Washington, United States, 98122 | **Active, not recruiting** |
| **United States, Wisconsin** | |
| University of Wisconsin Clinical Science Center  Madison, Wisconsin, United States, 53792 | **Recruiting** |
| University of Wisconsin Hospital & Clinics  Madison, Wisconsin, United States, 53792 | **Recruiting** |
| **Argentina** | |
| Centro de Investigacion Pergamino SA - Clinica Pergamino SA Pergamino, Buenos Aires, Argentina, B2700CPM | **Recruiting** |
| Instituto de Oncologia de Rosario  Rosario, Santa FE, Argentina, S2000KZE | **Recruiting** |
| Hospital Británico de Buenos Aires  Caba, Argentina, C1280AEB | **Recruiting** |
| Centro de Educacion Medica e Investigaciones Clinicas "Norberto Quirno" Cemic, Caba, Argentina, C1431FWO | **Recruiting** |
| Clinica Universitaria Reina Fabiola  Cordoba, Argentina, X5004FHP | **Recruiting** |
| Hospital Privado Centro Medico de Cordoba  Cordoba, Argentina, X5016KEH | **Recruiting** |
| **Australia, New South Wales** | |
| Chris O'Brien Lifehouse  Camperdown, New South Wales, Australia, 2050 | **Recruiting** |
| St Vincent's Hospital Sydney  Darlinghurst, New South Wales, Australia, 2010 | **Recruiting** |
| Port Macquarie Base Hospital  Port Macquarie, New South Wales, Australia, 2444 | **Recruiting** |
| **Australia, Queensland** | |
| ICON Cancer Centre Wesley  Auchenflower, Queensland, Australia, 4066 | **Recruiting** |
| River City Pharmacy  Auchenflower, Queensland, Australia, 4066 | **Recruiting** |
| Princess Alexandra Hospital  Brisbane, Queensland, Australia, 4102 | **Recruiting** |
| ICON Cancer Centre Chermside  Chermside, Queensland, Australia, 4032 | **Recruiting** |
| ICON Cancer Centre South Brisbane  South Brisbane, Queensland, Australia, 4101 | **Recruiting** |
| Integrated Clinical Oncology Network Pty Ltd (ICON)  South Brisbane, Queensland, Australia, 4101 | **Recruiting** |
| ICON Cancer Centre Southport  Southport, Queensland, Australia, 4215 | **Recruiting** |
| **Australia, Victoria** | |
| Peter MacCallum Cancer Centre  Melbourne, Victoria, Australia, 3000 | **Recruiting** |
| Peter MacCallum Cancer Centre  North Melbourne, Victoria, Australia, 3051 | **Recruiting** |
| **Belgium** | |
| AZ Klina  Brasschaat, Belgium, 2930 | **Recruiting** |
| A.Z. Sint-Lucas  Gent, Belgium, 9000 | **Recruiting** |
| UZ Gent  Gent, Belgium, 9000 | **Recruiting** |
| AZ Groeninge  Kortrijk, Belgium, 8500 | **Recruiting** |
| Clinique Saint-Pierre Ottignies  Ottignies, Belgium, 1340 | **Recruiting** |
| CHU UCL Namur site Godinne  Yvoir, Belgium, 5530 | **Recruiting** |
| **Brazil** | |
| Instituto Nacional de Câncer José de Alencar Gomes da Silva - INCA  Rio de Janeiro, RJ, Brazil, 20230-130 | **Recruiting** |
| Instituto Nacional de Câncer José de Alencar Gomes da Silva - INCA  Rio de Janeiro, RJ, Brazil, 20231-050 | **Recruiting** |
| Instituto D'Or de Pesquisa e Ensino  Rio de Janeiro, RJ, Brazil, 22281-100 | **Recruiting** |
| Associacao Hospital de Caridade de Ijui  Ijui, RS, Brazil, 98700-000 | **Recruiting** |
| Sociedade Beneficencia e Caridade de Lajeado - Hospital Bruno Born Lajeado, RS, Brazil, 95900-022 | **Recruiting** |
| Centro de Pesquisa Clinica de Oncologia e Hematologia/Hospital Mae de Deus, Porto Alegre, RS, Brazil, 90110-270 | **Recruiting** |
| Centro de Pesquisa Clinica em Oncologia - Hospital Sao Lucas da Pontificia Universidade Catolica, Porto Alegre, RS, Brazil, 90610-000 | **Recruiting** |
| Hospital Nossa Senhora da Conceicao - Grupo Hospitalar Conceicao  Porto Alegre, RS, Brazil, 91350-200 | **Recruiting** |
| Hospital CopaDor  Rio de Janeiro, RS, Brazil, 22031-011 | **Recruiting** |
| Hospital Gloria D'Or  Rio de Janeiro, RS, Brazil, 22211-230 | **Recruiting** |
| Oncologia D'Or  Rio de Janeiro, RS, Brazil, 22251-040 | **Recruiting** |
| Oncologia D'Or  Rio de Janeiro, RS, Brazil, 22291-110 | **Recruiting** |
| Fundacao Pio XII - Hospital de Cancer de Barretos  Barretos, SP, Brazil, 14784-400 | **Recruiting** |
| Faculdade de Medicina do ABC - Centro de Estudos e Pesquisas de Hematologia e Oncologia (CEPHO), Santo Andre, SP, Brazil, 09060-650 | **Recruiting** |
| Faculdade de Medicina do ABC - Centro de Estudos e Pesquisas de Hematologia e Oncologia (CEPHO), Santo Andre, SP, Brazil, 09060-870 | **Recruiting** |
| Instituto do Cancer do Estado de Sao Paulo - ICESP  Sao Paulo, SP, Brazil, 01246-000 | **Recruiting** |
| Instituto do Cancer do Estado de Sao Paulo-ICESP-Nucleo de Pesquisa Sao Paulo, SP, Brazil, 01246-000 | **Recruiting** |
| Sociedade Beneficente de Senhoras Hospital Sírio Libanês  Sao Paulo, SP, Brazil, 01308-050 | **Not yet recruiting** |
| Hospital Alemão Oswaldo Cruz  Sao Paulo, SP, Brazil, 01327-001 | **Recruiting** |
| **Canada, Alberta** | |
| Tom Baker Cancer Centre - Alberta Health Services  Calgary, Alberta, Canada, T2N 4N2 | **Recruiting** |
| **Canada, Ontario** | |
| The Ottawa Hospital Cancer Center  Ottawa, Ontario, Canada, K1H 8L6 | **Recruiting** |
| **Canada, Quebec** | |
| Centre integre universitaire de sante et de services sociaux du Saguenay-Lac-Saint-Jean, Chicoutimi, Quebec, Canada, G7H 5H6 | **Recruiting** |
| CHUM - Centre Hospitalier de l'Universite de Montreal  Montreal, Quebec, Canada, H2X 3E4 | **Recruiting** |
| Jewish General Hospital  Montreal, Quebec, Canada, H3T 1E2 | **Recruiting** |
| Centre integre universitaire de sante et de services sociaux de l'Estrie Sherbrooke, Quebec, Canada, J1H 5N4 | **Recruiting** |
| **Chile** | |
| Sociedad Prosalud Montes y Orlandi Ltda. Fantasy name (Orlandi Oncologia), Santiago, Metropolitana, Chile, 7500713 | **Recruiting** |
| Centro de Investigacion Clinica del Sur  Temuco, Region DE LA Araucania, Chile, 4781156 | **Recruiting** |
| Sociedad de Investigaciones Medicas Ltda (SIM)  Temuco, Region DE LA Araucania, Chile, 4810469 | **Recruiting** |
| Sociedad de Investigaciones Medicas Ltda (SIM)  Temuco, Region DE LA Araucania, Chile, 4810561 | **Recruiting** |
| Centro de Investigaciones Clinicas Vina del Mar  Vina del Mar, Valparaiso, Chile, 2540488 | **Recruiting** |
| Centro de Investigaciones Clinicas Vina del Mar  Vina del Mar, Valparaiso, Chile, 2540634 | **Recruiting** |
| **China, Anhui** | |
| The First Affiliated Hospital of Anhui Medical University  Hefei, Anhui, China, 230022 | **Recruiting** |
| **China, Beijing** | |
| Beijing Cancer Hospital  Beiijng, Beijing, China, 100142 | **Recruiting** |
| Peking University First Hospital / Urology Department  Beijing, Beijing, China, 100034 | **Not yet recruiting** |
| Peking University Third Hospital  Beijing, Beijing, China, 100191 | **Not yet recruiting** |
| **China, Fujian** | |
| The First Affiliated Hospital of Fujian Medical University  Fuzhou, Fujian, China, 350005 | **Recruiting** |
| First Affiliated Hospital of Xiamen University  Xiamen, Fujian, China, 361003 | **Not yet recruiting** |
| **China, Hubei** | |
| Union Hospital, Tongji Medical College of Huazhong University of Science & Technology, Wuhan, Hubei, China, 430022 | **Recruiting** |
| Tongji Hospital, Tongji Medical College, Huazhong University of Science and Technology, Wuhan, Hubei, China, 430030 | **Not yet recruiting** |
| **China, Jiangsu** | |
| Nanjing Drum Tower Hospital , The Affiliated Hospital of Nanjing University Medical School, Nanjing, Jiangsu, China, 210008 | **Recruiting** |
| Second Affiliated Hospital of Suzhou University  Suzhou, Jiangsu, China, 215004 | **Recruiting** |
| **China, Jiangxi** | |
| The First Affiliated Hospital of Nanchang University  Nanchang, Jiangxi, China, 330006 | **Recruiting** |
| **China, Shanghai** | |
| Zhongshan Hospital Fudan University  Shanghai, Shanghai, China, 200032 | **Recruiting** |
| Huashan Hospital Fudan University  Shanghai, Shanghai, China, 200040 | **Not yet recruiting** |
| Shanghai General Hospital  Shanghai, Shanghai, China, 200080 | **Recruiting** |
| **China, Shanxi** | |
| The First Affiliated Hospital of Xi'an Jiaotong University  Xi'an, Shanxi, China, 710061 | **Recruiting** |
| **China, Sichuan** | |
| West China Hospital of Sichuan University  Chengdu, Sichuan, China, 610041 | **Recruiting** |
| **China, Yunnan** | |
| Yunnan Cancer Hospital  Kunming, Yunnan, China, 650118 | **Recruiting** |
| **China, Zhejiang** | |
| Zhejiang Provincial People's Hospital  Hangzhou, Zhejiang, China, 310014 | **Recruiting** |
| Zhejiang Cancer Hospital  Hangzhou, Zhejiang, China, 310022 | **Recruiting** |
| Ningbo First Hospital  Ningbo, Zhejiang, China, 315010 | **Recruiting** |
| **China** | |
| Chongqing University Cancer Hospital  Chongqing, China, 400030 | **Recruiting** |
| Ruijin Hospital Affiliated to Shanghai Jiaotong University School of Medicine  Shanghai, China, 200025 | **Recruiting** |
| Fudan University Cancer Hospital, Deptartment of Urology  Shanghai, China, 200032 | **Recruiting** |
| The Fifth People's Hospital of Shanghai, Fudan University  Shanghai, China, 201100 | **Recruiting** |
| The Second Hospital of Tianjin Medical University  Tianjin, China, 300211 | **Recruiting** |
| **Czechia** | |
| Fakultní nemocnice Hradec Králové  Hradec Kralove, Czechia, 500 05 | **Recruiting** |
| Fakultni nemocnice Ostrava  Ostrava-Poruba, Czechia, 708 52 | **Recruiting** |
| Multiscan s.r.o.  Pardubice, Czechia, 532 03 | **Recruiting** |
| Fakultní nemocnice Královské Vinohrady  Praha 10, Czechia, 100 34 | **Recruiting** |
| Masarykova nemocnice v Usti nad Labem, o.z. Krajska zdravotni a.s.  Usti nad Labem, Czechia, 401 13 | **Not yet recruiting** |
| **Finland** | |
| HUS Helsinki University Hospital  Helsinki, Finland, 00029 | **Recruiting** |
| Docrates Cancer Center  Helsinki, Finland, 00180 | **Recruiting** |
| HUS Pharmacy, Clinical Trials  Helsinki, Finland, 00290 | **Recruiting** |
| OYS apteekki  Kempele, Finland, 90440 | **Recruiting** |
| Kuopio University Hospital  Kuopio, Finland, 70029 | **Recruiting** |
| Kuopio University Hospital  Kuopio, Finland, 70210 | **Recruiting** |
| Oulun yliopistollinen sairaala  Oulu, Finland, 90220 | **Recruiting** |
| Tampere University Hospital  Tampere, Finland, 33520 | **Recruiting** |
| Turku University Hospital  Turku, Finland, 20520 | **Recruiting** |
| **France** | |
| Centre d'Oncologie du Pays-Basque  Bayonne, France, 64100 | **Recruiting** |
| Clinique CAPIO Belharra  Bayonne, France, 64100 | **Recruiting** |
| Hopital Pellegrin  Bordeaux Cedex, France, 33076 | **Recruiting** |
| Hopital Saint Andre - CHU de Bordeaux  Bordeaux, France, 33075 | **Recruiting** |
| CHD Vendée  LA ROCHE SUR YON cedex 9, France, 85925 | **Recruiting** |
| Clinique Victor Hugo-Centre Jean Bernard  Le Mans, France, 72000 | **Recruiting** |
| Clinique Victor Hugo  Le Mans, France, 72015 Cedex 02 | **Recruiting** |
| Centre Leon Berard  Lyon Cedex 08, France, 69373 | **Recruiting** |
| Centre Léon Bérard  Lyon CEDEX 08, France, 69373 | **Recruiting** |
| CHU Montpellier-Hopital Saint Eloi  Montpellier cedex 5, France, 34295 | **Recruiting** |
| Hopital Europeen Georges Pompidou  Paris Cedex 15, France, 75908 | **Recruiting** |
| Hopital Saint-Louis  Paris, France, 75010 | **Recruiting** |
| Clinique Sainte Anne  Strasbourg, France, 67000 | **Recruiting** |
| Hopitaux Universitaires de Strasbourg - ICANS  Strasbourg, France, 67200 | **Recruiting** |
| Hopital Foch  Suresnes Cedex, France, 92151 | **Recruiting** |
| Hopital Foch  Suresnes, France, 92150 | **Recruiting** |
| Institut Gustave Roussy  VILLEJUIF cedex, France, 94805 | **Recruiting** |
| **Germany** | |
| Universitatsklinikum Erlangen Medizinische Klinik 5  Erlangen, Bayern, Germany, 91054 | **Not yet recruiting** |
| Universitaetsklinikum Duesseldorf  Duesseldorf, Germany, 40225 | **Recruiting** |
| Universitaetsklinikum Erlangen, Urologische und Kinderurologische Klinik, Erlangen, Germany, 91054 | **Not yet recruiting** |
| Universitaetsklinikum Hamburg-Eppendorf  Hamburg, Germany, 20246 | **Recruiting** |
| Universitaetsklinik Heidelberg  Heidelberg, Germany, 69120 | **Recruiting** |
| Diagnostikzentrum  Kirchheim, Germany, 73230 | **Recruiting** |
| Universitaetsklinikum Muenster  Muenster, Germany, 48149 | **Recruiting** |
| Studienpraxis Urologie  Nuertingen, Germany, 72622 | **Recruiting** |
| Labor Dr. Gartner  Ravensburg, Germany, 88212 | **Recruiting** |
| Laborgemeinschaft Reutlingen  Reutlingen, Germany, 72770 | **Recruiting** |
| Kliniken Nordoberpfalz AG  Weiden, Germany, 92637 | **Not yet recruiting** |
| **Hungary** | |
| Semmelweis Egyetem Urologiai Klinika  Budapest, Hungary, 1082 | **Recruiting** |
| Országos Onkológiai Intézet  Budapest, Hungary, 1122 | **Recruiting** |
| Uzsoki Utcai Korhaz  Budapest, Hungary, 1145 | **Recruiting** |
| Uzsoki Utcai Kórház  Budapest, Hungary, 1145 | **Recruiting** |
| Debreceni Egyetem Klinikai Kozpont  Debrecen, Hungary, 4032 | **Recruiting** |
| Pecsi Tudomanyegyetem Klinikai Kozpont Onkoterapias Intezet  Pecs, Hungary, 7624 | **Recruiting** |
| **Israel** | |
| Rambam Health Care Campus  Haifa, Israel, 3109601 | **Recruiting** |
| Shaare Zedek Medical Center  Jerusalem, Israel, 9103102 | **Recruiting** |
| Tel Aviv Sourasky Medical Center  Tel Aviv, Israel, 6423906 | **Recruiting** |
| **Italy** | |
| Azienda Ospedaliero-Universitaria Policlinico Sant' Orsola Malpighi Bologna, BO, Italy, 40138 | **Recruiting** |
| ASST di Cremona  Cremona, CR, Italy, 26100 | **Recruiting** |
| Istituto Scientifico Romagnolo per lo Studio e la Cura dei Tumori (IRST) IRCCS, Meldola, FC, Italy, 47014 | **Recruiting** |
| Azienda Ospedaliera S. Maria  Terni, TN, Italy, 05100 | **Recruiting** |
| Ospedale Santa Chiara  Trento, TN, Italy, 38122 | **Recruiting** |
| AOU San Luigi Gonzaga  Orbassano, TO, Italy, 10043 | **Recruiting** |
| ASST-Spedali Civili di Brescia  Brescia, Italy, 25123 | **Not yet recruiting** |
| A.O.R.N. "A. Cardarelli"  Napoli, Italy, 80131 | **Not yet recruiting** |
| Istituto Nazionale Tumori IRCCS Fondazione G. Pascale - Napoli  Napoli, Italy, 80131 | **Recruiting** |
| **Japan** | |
| Nagoya University Hospital  Nagoya, Aichi, Japan, 466-8560 | **Recruiting** |
| Hirosaki University School of Medicine & Hospital  Hirosaki, Aomori, Japan, 036-8563 | **Recruiting** |
| National Cancer Center Hospital East  Kashiwa, Chiba, Japan, 277-8577 | **Recruiting** |
| National Hospital Organization Shikoku Cancer Center  Matsuyama, Ehime, Japan, 791-0280 | **Recruiting** |
| National Hospital Organization Kure Medical Center and Chugoku Cancer Center, Kure, Hiroshima, Japan, 737-0023 | **Recruiting** |
| National Hospital Organization Hokkaido Cancer Center  Sapporo, Hokkaido, Japan, 003-0804 | **Recruiting** |
| Hokkaido University Hospital  Sapporo, Hokkaido, Japan, 060-8648 | **Recruiting** |
| Kanazawa University Hospital  Kanazawa, Ishikawa, Japan, 920-8641 | **Recruiting** |
| Yokohama City University Medical Center  Yokohama, Kanagawa, Japan, 232-0024 | **Recruiting** |
| Yokosuka Kyosai Hospital  Yokosuka, Kanagawa, Japan, 238-8558 | **Recruiting** |
| Osaka International Cancer Institute  Osaka-shi, Osaka, Japan, 5418567 | **Recruiting** |
| Kindai University Hospital  Osakasayama, Osaka, Japan, 589-8511 | **Recruiting** |
| Osaka University Hospital  Suita, Osaka, Japan, 565-0871 | **Recruiting** |
| Hamamatsu University School of Medicine, University Hospital Hamamatsu, Shizuoka, Japan, 431-3192 | **Recruiting** |
| National Hospital Organization Tokyo Medical Center  Meguro-ku, Tokyo, Japan, 152-8902 | **Recruiting** |
| Keio University Hospital  Shinjuku-ku, Tokyo, Japan, 160-8582 | **Recruiting** |
| Chiba Cancer Center  Chiba, Japan, 260-8717 | **Recruiting** |
| National Hospital Organization Kyushu Cancer Center  Fukuoka, Japan, 811-1395 | **Recruiting** |
| Kagoshima University Hospital  Kagoshima, Japan, 890-8520 | **Recruiting** |
| National Hospital Organization Kumamoto Medical Center  Kumamoto, Japan, 860-0008 | **Recruiting** |
| Tokushima University Hospital  Tokushima, Japan, 770-8503 | **Recruiting** |
| Yamagata Prefectural Central Hospital  Yamagata, Japan, 990-2292 | **Recruiting** |
| Yamagata University Hospital  Yamagata, Japan, 990-9585 | **Recruiting** |
| **Republic of Korea** | |
| Clinical Trial Pharmacy, National Cancer Center  Goyang-si, Gyeonggi-do, Korea, Republic of, 10408 | **Recruiting** |
| National Cancer Center  Goyang-si, Gyeonggi-do, Korea, Republic of, 10408 | **Recruiting** |
| Pusan National University Hospital  Busan, Korea, Republic of, 49241 | **Recruiting** |
| Kyungpook National University Chilgok Hospital  Daegu, Korea, Republic of, 41404 | **Recruiting** |
| Seoul National University Hospital  Seoul, Korea, Republic of, 03080 | **Recruiting** |
| Clinical Trial Center, Severance Hospital, yonsei University Health System Seoul, Korea, Republic of, 03722 | **Recruiting** |
| Severance Hospital, Yonsei University Health System  Seoul, Korea, Republic of, 03722 | **Recruiting** |
| Asan Medical Center  Seoul, Korea, Republic of, 05505 | **Recruiting** |
| Cancer Center Clinical Trial, Asan Medical Center  Seoul, Korea, Republic of, 05505 | **Recruiting** |
| Clinical Trials Center Pharmacy  Seoul, Korea, Republic of, 06351 | **Recruiting** |
| Samsung Medical Center  Seoul, Korea, Republic of, 06351 | **Recruiting** |
| Clinical Trial Pharmacy, The Catholic University of Korea  Seoul, Korea, Republic of, 06591 | **Recruiting** |
| The Catholic University of Korea, Seoul St. Mary's Hospital  Seoul, Korea, Republic of, 06591 | **Recruiting** |
| **New Zealand** | |
| Tauranga Urology Research Limited  Tauranga, BAY OF Plenty, New Zealand, 3112 | **Recruiting** |
| Canterbury District Health Board  Christchurch, Canterbury, New Zealand, 8011 | **Recruiting** |
| Waikato Hospital  Hamilton, Waikato, New Zealand, 3204 | **Recruiting** |
| Auckland City Hospital  Auckland, New Zealand, 1023 | **Recruiting** |
| Auckland Regional Blood & Cancer Service  Auckland, New Zealand, 1023 | **Recruiting** |
| **Norway** | |
| Sykehusapoteket Ostfold, Kalnes  Gralum, Norway, 1712 | **Recruiting** |
| Ostfold County Hospital, Kalnes  Gralum, Norway, 1714 | **Recruiting** |
| Akershus University Hospital  Lorenskog, Norway, 1478 | **Recruiting** |
| Oslo University Hospital -Ullevål & Radiumhospitalet  Oslo, Norway, 0379 | **Active, not recruiting** |
| St. Olavs Hospital, Trondheim University Hospital  Trondheim, Norway, 7030 | **Recruiting** |
| Sykehusapoteket i Trondheim  Trondheim, Norway, 7030 | **Recruiting** |
| **Peru** | |
| Clinica Monte Carmelo S.C.R.LTDA.  Arequipa, Peru | **Recruiting** |
| Hospital Militar Central "Coronel Luis Arias Schreiber"  Lima, Peru, Lima 11 | **Active, not recruiting** |
| Instituto Nacional de Enfermedades Neoplasicas  Lima, Peru, Lima 34 | **Not yet recruiting** |
| Clinica Internacional Sede San Borja  Lima, Peru, Lima 41 | **Recruiting** |
| Clinica Oncosalud  Lima, Peru, Lima 41 | **Recruiting** |
| **Poland** | |
| Szpital Specjalistyczny w Brzozowie Podkarpacki Osrodek Onkologiczny im. ks. B. Markiewicza, Brzozow, Poland, 36-200 | **Recruiting** |
| Szpitale Pomorskie Sp. z o.o. Oddzial Onkologii i Radioterapii  Gdynia, Poland, 81-519 | **Recruiting** |
| Przychodnia Lekarska "Komed" Roman Karaszewski  Konin, Poland, 62-500 | **Recruiting** |
| Europejskie Centrum Zdrowia Otwock Szpital im. Fryderyka Chopina Otwock, Poland, 05-400 | **Recruiting** |
| City Clinic Sp. z o.o.  Warsaw, Poland, 02-473 | **Recruiting** |
| NZOZ Szpital Mazovia; Oddzial urologiczny  Warszawa, Poland, 02-797 | **Recruiting** |
| **Portugal** | |
| Centro Clínico Académico - Braga, Associação (2CABraga)  Braga, Portugal, 4710-243 | **Recruiting** |
| Instituto Português Oncologia de Coimbra Francisco Gentil - E.P.E Coimbra, Portugal, 3000-075 | **Recruiting** |
| Fundação Champalimaud  Lisboa, Portugal, 1400-038 | **Recruiting** |
| Hospital da Luz Lisboa, Portugal, 1500-650 | **Recruiting** |
| Centro Hospitalar do Porto - Hospital de Santo Antonio  Porto, Portugal, 4099-001 | **Recruiting** |
| Instituto Português de Oncologia do Porto Francisco Gentil  Porto, Portugal, 4200-072 | **Recruiting** |
| **South Africa** | |
| Cancercare Langenhoven Drive Oncology Centre  Port Elizabeth, Eastern CAPE, South Africa, 6045 | **Recruiting** |
| Wits Clinical Research Charlotte Maxeke Johannesburg Academic Hospital (CMJAH), Clinical Trial Site, Johannesburg, Gauteng, South Africa, 2193 | **Recruiting** |
| Wits Clinical Research  Johannesburg, Gauteng, South Africa, 2193 | **Recruiting** |
| The Medical Oncology Centre of Rosebank  Johannesburg, Gauteng, South Africa, 2196 | **Recruiting** |
| CancerCare Rondebosch Oncology  Cape Town, Western CAPE, South Africa, 7700 | **Recruiting** |
| Outeniqua Cancercare Oncology Unit  George, Western CAPE, South Africa, 6530 | **Recruiting** |
| Cape Town Oncology Trials  Kraaifontein, Cape Town, Western CAPE, South Africa, 7570 | **Recruiting** |
| **Spain** | |
| Hospital Clinico Universitario de Santiago de Compostela  Santiago de Compostela, A Coruna, Spain, 15706 | **Recruiting** |
| Hospital General Universitario de Elche  Elche, Alicante, Spain, 03203 | **Recruiting** |
| Institut Catala d'Oncologia - ICO L'Hospitalet  L'Hospitalet de Llobregat, Barcelona, Spain, 08908 | **Recruiting** |
| Corporacio Sanitaria i Universitaria Parc Tauli  Sabadell, Barcelona, Spain, 08208 | **Recruiting** |
| Hospital Universitario Virgen de la Arrixaca  El Palmar, Murcia, Spain, 30120 | **Recruiting** |
| Hospital Universitari Vall d'Hebron  Barcelona, Spain, 08035 | **Recruiting** |
| Hospital Clinic de Barcelona  Barcelona, Spain, 08036 | **Recruiting** |
| Hospital Universitario La Princesa  Madrid, Spain, 28006 | **Recruiting** |
| Hospital General Universitario Gregorio Maranon  Madrid, Spain, 28009 | **Recruiting** |
| MD Anderson Cancer Center  Madrid, Spain, 28033 | **Recruiting** |
| Hospital Universitario 12 De Octubre  Madrid, Spain, 28041 | **Recruiting** |
| **Sweden** | |
| Klinisk Provningsenhet (KPE) Onkologi  Goteborg, Sweden, 413 45 | **Not yet recruiting** |
| Patientomrade Backencancer, Tema Cancer  Stockholm, Sweden, 171 76 | **Recruiting** |
| Cancercentrum  Umeå, Sweden, 901 85 | **Recruiting** |
| **United Kingdom** | |
| University Hospitals Plymouth NHS Trust  Plymouth, Devon, United Kingdom, PL6 8DH | **Recruiting** |
| The Clatterbridge Cancer Centre NHS Foundation Trust  Bebington, Wirral, United Kingdom, CH63 4JY | **Recruiting** |
| Royal Cornwall Hospitals NHS Trust  Cornwall, United Kingdom, TR1 3LJ | **Recruiting** |
| NHS Greater Glasgow and Clyde, The Beatson West of Scotland Cancer Centre, Glasgow, United Kingdom, G12 0YN | **Recruiting** |
| The Clatterbridge Cancer Centre - Liverpool  Liverpool, United Kingdom, L7 8YA | **Recruiting** |
| Imperial College Healthcare NHS Trust  London, United Kingdom, W12 0HS | **Recruiting** |
| Imperial College Healthcare NHS Trust  London, United Kingdom, W2 1NY | **Recruiting** |
| Imperial College Healthcare NHS Trust, Charing Cross Hospital  London, United Kingdom, W6 8RF | **Recruiting** |
| Oxford University Hospitals NHS Trust  Oxford, United Kingdom, OX3 7LE | **Recruiting** |

**Methods**

**DDR alteration analysis**

Patients were enrolled based on results from the FoundationOne CDx or FoundationOne Liquid CDx test (Foundation Medicine, Cambridge, MA, USA). The FoundationOne tests are qualitative next-generation-sequencing–based in vitro diagnostic tests that use targeted, high-throughput hybridization-based capture technology to detect gene alterations (indels, rearrangements, and copy number variations) in up to 324 genes. Both tests have been approved as companion diagnostics to identify patients with prostate cancer who may benefit from treatment with certain poly(ADP-ribose) polymerase inhibitors. Concordance between the two tests for *BRCA1* and *BRCA2* in prostate and ovarian cancer was observed at the sample and variant levels with a positive predictive value of 88.03% and 87.28%, respectively, and a negative predicitve value of 95.68% and 99.83%, respectively, as described on the FDA label: https://www.accessdata.fda.gov/cdrh_docs/pdf19/P190032B.pdf.

Furthermore, both tests will be performed on the majority of patients to generate additional concordance data for the other genes in the DNA damage response panel.
